L.M. Dreiss et al.

1

Golden-cheeked warbler habitat changes

Lindsay M. Dreiss, Defenders of Wildlife, 1130 17<sup>th</sup> Street NW, Washington DC, USA

## **Spatiotemporal patterns in Golden-cheeked Warbler breeding habitat quality and quantity**

Lindsay M. Dreiss<sup>1</sup>, Paul Sanchez-Navarro, Bryan Bird

Defenders of Wildlife, 1130 17<sup>th</sup> Street NW, Washington, DC, 20036 USA

---

<sup>1</sup> Corresponding author: [lrosa@defenders.org](mailto:lrosa@defenders.org)

1 **ABSTRACT**

2 The Golden-cheeked Warbler, *Setophaga chrysoparia*, is a migratory songbird listed as  
3 endangered under the federal Endangered Species Act that breeds exclusively in central Texas  
4 and is heavily impacted by habitat conversion. The species relies on mixed Ashe-juniper and oak  
5 woodlands for nest-building and shelter during spring and early summer months. Using land  
6 cover data spanning the last 25 years, we conduct a geospatial analysis to quantify changes and  
7 identify shifts in breeding habitat quantity and quality. Since 1985, 13% of all forests within the  
8 warbler's breeding range were disturbed, with greater incidences near San Antonio (32%) and  
9 Austin (24%) metropolitan areas. Additionally, data show a 45% decrease in high-quality habitat  
10 (i.e., intact mixed or evergreen core forests) and a decrease in patch size. Habitats within  
11 protected areas see a less sharp decline in habitat quality and large increases in warbler sightings,  
12 but these only represent 10% of all highest-quality habitat in the breeding range. Drastic declines  
13 in habitat quality suggest that generalized metrics of conversion may underestimate true habitat  
14 loss as degradation may impact the ecological viability of remaining forests for warbler nesting.  
15 Further evidence suggests that the few protected areas within the Texas range continue to play a  
16 significant role in warbler breeding. This information will assist researchers and managers  
17 prioritizing conservation action and will inform upcoming species status determinations.

18

19 *Keywords: conservation, endangered species, forest loss, protected areas, Setophaga*

20 *chrysoparia*

21

22 Habitat loss and degradation through anthropogenic landscape modification are major drivers of  
23 declining global wildlife populations and serve as primary threats justifying species' listing  
24 under the United States Endangered Species Act (ESA; Hanski 2011, Bairlein 2016, Thompson  
25 et al. 2016, Horváth et al. 2019, Leu et al. 2019). Habitat disturbances are even more notable for  
26 Neotropical migrant songbirds that travel long and costly distances between breeding and non-  
27 breeding sites. The Breeding Bird Survey of North America – an active roadside census – shows  
28 that half of migratory bird species are declining; declines in long-distance Neotropical migrants  
29 are more pronounced than those of birds migrating shorter distances (see North American  
30 Breeding Bird Survey). These species depend on multiple habitats at different points in space  
31 and time, and the reduction in the quality of one habitat can have far-reaching consequences for  
32 overall species persistence (Robbins et al. 1989, Zitske et al. 2011, Taylor and Stutchbury 2015,  
33 Jackson et al. 2019). Breeding season, though a small proportion of the annual cycles for many  
34 migratory birds, is significant due to the more direct association with recruitment and fitness of a  
35 species (La Sorte et al. 2017). Therefore, loss and fragmentation of breeding habitats in the  
36 United States and other northern locales may have particularly severe ecological implications for  
37 imperiled migratory bird populations, especially when breeding distribution is very restricted.

38 The Golden-cheeked Warbler (*Setophaga chrysoparia*, GCWA) is a migratory songbird listed as  
39 endangered under the federal ESA that is heavily impacted by forest conversion. The species is a  
40 classic habitat specialist, breeding exclusively in the Edwards Plateau of central Texas,  
41 commonly referred to as the Texas Hill Country, and preferring mature, mixed Ashe-juniper and  
42 oak woodlands (Pulich 1976, Long et al. 2016). These tree species provide critical material for  
43 nest-building and shelter for main GCWA food sources. A wealth of literature assessing the  
44 influence of habitat factors on measures of GCWA survival (i.e., presence, reproductive success,

45 nest survival, and density) finds that forest composition, age, and patch size are important to  
46 species success (Pulich 1976, Shaw and Atkinson 1990, U.S. FWS 1992, Jetté et al. 1998,  
47 Magness et al. 2006, Diamond 2007, Colón et al. 2019). Their specialized preference for this  
48 already range-restricted forest type, as well as the high rates of habitat loss from urban  
49 developments and transportation infrastructure, led to the listing of GCWA as endangered by the  
50 U.S. Fish and Wildlife Service in 1990. Since listing, the threat of habitat loss persists with an  
51 estimated 29% reduction in total GCWA breeding habitat between 2000-2010 (Duarte et al.  
52 2013). As of 2020, a very small portion (1.5%) of Texas lands are protected or managed in a  
53 way that is consistent with biodiversity conservation (GAP 1 or GAP 2, U.S. Geological Survey  
54 2019). As such, the threat of further habitat loss and degradation remains, and continued  
55 monitoring and evaluation of landscapes and populations is necessary to understand the progress  
56 of GCWA recovery (Eichenwald et al. 2020).

57 A mandate of the ESA (section 4(c)(2)), regular reviews of the best available science and  
58 commercial information are conducted to revisit population trends, threats to recovery, and  
59 accuracy of the listing. Science that demonstrates a range-wide understanding of available  
60 breeding habitat conditions and distribution is critical to engaging federal action for proper  
61 protections for species recovery (La Sorte et al. 2015). Though coarse, this information may be  
62 used to estimate population size and viability and, in the case of habitat conversion, can also  
63 serve to evaluate the status and trends of major threats to species recovery (McGowan et al.  
64 2017). For GCWA, analyses are generally focused on habitat quantity, but additional nuances of  
65 habitat quality may result in a more refined understanding of population dynamics and can help  
66 managers prioritize habitats for conservation and restoration. Most importantly, regular updates  
67 to species habitat quality, quantity, location, and use are necessary to understand longer-term

68 temporal trends for better informed conservation efforts and for consideration in regular federal  
69 assessments revisiting species listing (and other) decisions. As such, up-to-date spatiotemporal  
70 trends in both the quality and quantity of species habitat at larger ecological scales are important  
71 for informing conservation management and supporting continued protections for threatened and  
72 endangered species.

73 The last review for GCWA was in 2014 and since then, there have been questions regarding  
74 species recovery and listing status. Currently available science on GCWA breeding habitat  
75 quantity assesses temporal trends on short timeframes (no more than a decade) and is now a  
76 decade out-of-date (Duarte et al. 2013). Additionally, available analyses of habitat quality are  
77 restricted to fractions of the breeding range (Loomis Austin 2008, Heger and Hayes 2013). There  
78 is a need for an amended breeding habitat assessment to reflect recent landscape changes and  
79 data availability as well as to inform upcoming species status assessments and the next steps in  
80 conservation planning.

81 The objective of this study is to conduct a more comprehensive spatiotemporal model of GCWA  
82 breeding habitat distribution. As part of this study, we use geospatial data spanning the last 25  
83 years to 1) update range-wide dynamics in GCWA habitat quantity, 2) analyze spatiotemporal  
84 patterns in habitat quality, and 3) compare findings with GCWA sightings and with local  
85 protected areas for considerations of habitat use and conservation, respectively.

86

87

88

89

90 **METHODS**

91 This study focuses on spatiotemporal changes to habitat loss and degradation for the entirety of  
92 the Golden-cheeked Warbler (*Setophaga chrysoparia*, GCWA) breeding range. Breeding and  
93 nesting activities are confined to central Texas, USA where ideal habitat varies in density and  
94 cover. Generally, habitat is more common in the southern and eastern regions of the range.  
95 Nesting habitat is generally defined by the tree species composition. Warblers nest in habitat  
96 made up of mature Ashe-juniper and a combination of other species such as live oak (*Quercus*  
97 *fusiformis*), Shallow-lobed oak (*Quercus breviloba*), Texas oak (*Q. buckleyi*), post oak (*Q.*  
98 *stellata*), blackjack oak (*Q. marilandica*), Lacey oak (*Q. glaucooides*), shin oak (*Q. sinuata*),  
99 sugarberry (*Celtis laevigata*), Texas ash (*Fraxinus texensis*), Nuttall's oak (*Quercus taxana*),  
100 cedar elm (*Ulmus crassifolia*), escarpment cherry (*Prunus serotina* var. *eximia*), pecan (*Carya*  
101 *illinoensis*), and little walnut (*Juglans microcarpa*) (U.S. FWS 1992). Quality habitat generally  
102 occurs in forest patches at least 100 hectares in size with moderate to high density of older trees.  
103 Forests with greater variation in tree height, greater average tree height, and greater density of  
104 deciduous oaks are also associated with higher densities of GCWA (Wahl et al. 1990).

105

106 **Data Acquisition**

107 All spatial data inputs are publicly available and analyzes focus on locations inside the GCWA  
108 range as defined by the U.S. Geological Survey's Gap Analysis Program (Table 1). Data were  
109 acquired in the summer of 2020 and analyses use ArcPro v 2.3 (Esri, USA). Final outputs are  
110 available at DOI 10.17605/OSF.IO/T4DJX.

111

## 112 **Spatial Analyses**

### 113 Habitat Disturbance

114 Google Earth Engine implementation of the LandTrendr algorithm (Kennedy et al. 2018)  
115 identify loss of habitat within the GCWA breeding range between 1985 and 2018 from Landsat  
116 imagery via breakpoints in temporal trends of NDVI (see Eichenwald et al. 2020). For our  
117 purposes, habitat loss is the area where one habitat is degraded quickly over a short period of  
118 time (including from natural or prescribed burns). For each year, we calculate the area of  
119 disturbed and undisturbed habitat throughout the entire breeding range, in urban and non-urban  
120 portions of the range, and in the metropolitan areas of Austin and San Antonio separately as  
121 defined by U.S. Census urban area boundaries. We conduct identical calculations with forest loss  
122 data from the National Land Cover Database to corroborate the analysis.

123

### 124 Habitat Quality

125 We apply a previously developed habitat assessment framework to determine location and  
126 acreage of quality GCWA habitat for the entire breeding range in 1985 and the most current year  
127 of the National Land Cover Dataset (2016, Heger and Hayes 2013). Coarser-resolution (250m)  
128 models of historical land use and land cover for the contiguous U.S. estimate habitat in 1985  
129 (Sohl et al. 2018). To account for differences in data resolution, we resample and mask the land  
130 cover data from 1985 by historic forest disturbance data (NLCD 2016), assuming that all pixels  
131 labeled as either a) never experiencing a disturbance or b) experiencing a disturbance after 1985  
132 were forested in 1985. The framework for scoring habitat suitability is based on a large body of  
133 literature citing forest composition, landscape fragmentation, and edge effects as related to

134 GCWA presence, survival and breeding success (e.g., Pulich 1976, U.S. FWS 1992, Jetté et al.  
135 1998, Magness et al. 2006, Peak 2007, Long et al. 2016, Reidy et al. 2017, Reidy et al. 2018,  
136 Colón et al. 2019). Additionally, Heger and Hayes tested multiple models and confirmed that an  
137 evergreen and mixed forest-based model performed better than models using only evergreen or  
138 mixed forest types. Habitats of highest quality are intact mixed or evergreen forest cores. Factors  
139 and criteria used for scoring habitat quality include:

140 Forest type: where mixed or evergreen forest types and deciduous forest within 100m of  
141 mixed/evergreen forest received a 1. All other land cover types received a 0.

142 Landscape context: neighborhood statistics were determine the percent of forest land cover in a  
143 210m radius. Areas that are 80-100% forested receive the highest score (4) and areas 0-20%  
144 forested the lowest (0).

145 Edge effect: scores are docked 1 point if they are within 100m of the forest edge.

146 For each dataset, we calculate the amount of habitat by score throughout the entire breeding  
147 range. Descriptive statistics are also generated to compare results in urban areas and specifically  
148 for Austin and San Antonio metropolitan areas.

149

#### 150 Hotspot Analysis

151 Occurrence data from open-source community science databases (iNaturalist and eBird) help  
152 assess hotspots in GCWA sightings. Point locations are grouped by date: sightings prior to 1995  
153 (n = 647) are considered more closely linked to historic landscape patterns and sightings after  
154 2010 (n = 14,568) may give more insight on current spatial patterns. Sightings during breeding



155 season (April to August) are used. Additionally, only non-duplicate points representing live  
156 observations are used if they are associated with an observation date and a meaningful latitude  
157 and longitude (not the centroid of the state or county). Kernel density is used to calculate density  
158 of GCWA sighting per square kilometer, with the top quartile of density values representing  
159 ‘hotspots’ for GCWA nesting. Centrality and directional distribution of sightings are also  
160 compared between the two time periods. We have high confidence in drawing conclusions about  
161 breeding location based on sighting location because a warbler’s range is on average a 100-m  
162 radius around its nest, depending on the quality of habitat (Reidy et al. 2018).

163

#### 164 Protected Areas Overlay

165 Community science data and results from habitat quantity and quality analyses are used in  
166 overlays to calculate descriptive statistics based on other landscape designations and coverages  
167 from the protected areas database of the U.S. (PADUS v 2.0). U.S. Geological Survey’s Gap  
168 Analysis Program (GAP) codes are specific to the management intent to conserve biodiversity.  
169 GAP 1 and 2 areas are managed in ways typically consistent with conservation and are  
170 considered ‘protected’ in this context.

171

## 172 **RESULTS**

173 Before 1985, 25.64% of Golden-cheeked Warbler (GCWA) breeding range was covered by  
174 forest lands (over 4.54 million acres). Between 1985 and 2016, 13% of all forests within the  
175 warbler’s breeding range were converted to other land uses (Fig. 1). Forest conversion was more  
176 extreme in parts of the range in metropolitan areas, with 24% forest loss in the Austin

177 metropolitan area and 32% loss in the San Antonio metropolitan area. Generally, for all regions,  
178 there are greater rates of decline in more recent years. Habitat quality also declined during this  
179 time period throughout the breeding range (Fig. 2). In the 1980s, over one-tenth of the forested  
180 habitat within GCWA breeding range was intact mixed or evergreen core forests. In 2016, high  
181 quality habitat made up 5% of the breeding range, indicating a 45% decrease in the highest  
182 quality breeding habitat (Fig. 3). Remaining quality habitat is more fragmented, with  
183 significantly smaller patch sizes than in 1985 (Fig. 4;  $t = 1.96$ ,  $p$  value  $< 0.001$ ). Generally,  
184 quality habitat is more concentrated along the southeastern extent of the breeding range and  
185 some forested areas to the northwest of Austin and in the northern parts of the breeding range  
186 have improved since 1985 (Fig. 2). Habitats within protected areas (i.e., GAP Code 1 & 2) see  
187 less sharp declines in habitat quality from 27% to 20% of the breeding range (27% decrease; Fig.  
188 3). However, protected habitats currently represent only 10% of all highest-quality habitat in the  
189 breeding range.

190 GCWA sightings are generally spatially coincident with habitat quality. In the 1980s, 39% of  
191 sightings were in high-quality habitat. As of 2020, sightings in high-quality habitat had dropped  
192 to 28%, but this is still disproportionately high given that only 5% of the breeding range consists  
193 of high-quality breeding habitat. The proportion of sightings in protected areas in the breeding  
194 range has increased dramatically from 5% of sightings before 1995 to 59% after 2010. There  
195 were small, localized shifts in the location of GCWA sighting hotspots between the 1980s and  
196 2020, but breeding range-wide, the distribution of hotspots (centrality and dispersion) remains  
197 the same (Fig. 4). Sightings were once very concentrated to the southeastern portions of the  
198 range, but are now less concentrated, with a few hotspots formed in western parts of the range.

199 Parks in and around San Antonio metropolitan area and Lost Maples Natural Area continue to be  
200 hotspots for sightings. All but one of the hotspots were associated with a protected area (Fig. 5).

201

## 202 **DISCUSSION**

203 We quantify the absolute change in forest cover within Golden-cheeked Warbler (GCWA)  
204 breeding range and changes in breeding habitat quality over a 30-year period. Overall, we  
205 estimate a 13% loss in breeding habitat with high spatial heterogeneity in landscape conversion  
206 closely tied to human developments. This value is lower than other estimates and may be  
207 reflective of changing forest dynamics that occur over the longer-term study period- this would  
208 support our findings that greater decline has occurred in more recent years (Groce et al. 2010,  
209 Duarte et al. 2013). Additionally, drastic declines in habitat quality suggest that 13% is an  
210 underestimation of effective habitat loss as degradation may impact the ecological viability of  
211 remaining forests for GCWA nesting. The amount of intact core forest habitat fell 45% in the 30-  
212 year period leaving quality breeding sites concentrated along the southeastern extent of the  
213 breeding range and in protected areas.

214 Human impact is on the rise in Texas landscapes and may compromise habitat quality. In recent  
215 years, Texas has had the largest increases in population of any state in the U.S. (U.S. Census  
216 Bureau 2020). In the 30-year period that was studied, the population grew 73.9% and growth is  
217 projected to continue at a steady rate to 2050 (88.3% increase in the next three decades; Texas  
218 Demographic Center 2019). Within GCWA breeding range, at least four counties are projected  
219 to see population increases of over 100% by 2050, all of which coincide with areas of quality  
220 habitat in the southeastern parts of the range: Williamson, Hayes, Comal, and Kendall counties.

221 Increased development pressures in the Texas Hill Country could continue to drive the trends of  
222 GCWA habitat disturbance and degradation. Our data indicate that quality forests have  
223 undergone fragmentation resulting in smaller habitat patches. Similar trends have been reported  
224 more specifically for Ashe-juniper distributions across the state due to an increase in pastureland  
225 and development (Diamond 1997). A reduction in canopy cover can lead to decreased nest  
226 success for forest songbirds (Martin and Roper 1988, Trzcinski et al. 1999, Twedt et al. 2001).  
227 Canopy cover is also essential to conceal GCWA nests located in the mid-story to upper  
228 canopies of trees, thus reducing the probability of nest predation and parasitism (Reidy et al.  
229 2008). Additionally, fragmentation of breeding habitat may represent barriers to dispersal of  
230 birds and important genetic material (Lindsay et al. 2008). Hence, there is already evidence of  
231 notable genetic differentiation among populations of GCWA, having important implications for  
232 management of species like GCWA that are relatively vagile, but highly specialized in their  
233 habitat preferences. Restoration and protection of connected patches may be the best option for  
234 conserving or recovering such species (Young and Clarke 2000).

235 We found that only 10% of the highest quality forest habitat are in protected areas, creating both  
236 challenges and opportunities. These lands, because they are managed in ways consistent with  
237 biodiversity conservation, generally represent higher quality habitats with fewer human  
238 disturbances (Rosa and Malcom 2020). Our findings indicate that protected areas within GCWA  
239 breeding range also exhibited declines in quality, but degradation was buffered relative to the  
240 overall range. As human populations grow and landscape conversion continues, protected areas  
241 are expected to grow in importance. Nearly all (17 out of 18) of GCWA sighting hotspots from  
242 our analysis were associated with a protected area. Additionally, the proportion of sightings that  
243 occurred on protected areas saw a significant increase. It should be noted that public lands may

244 have a higher proportion of sighting simply due to their accessibility to observers. However, a  
245 preliminary analysis of GCWA occupancy models from Morrison et al. (2010) also demonstrates  
246 the importance of protected areas to GCWA success: areas with at least 70% probability of  
247 occupancy make up 13% of the breeding range, but 62% of protected areas. Public protected  
248 areas can play a central role in habitat conservation efforts because they are more amenable to  
249 the application of broad-scale management strategies that more closely align with species  
250 conservation. However, the extent to which public protected areas can benefit migratory bird  
251 populations depends on how well protected areas are represented within the breeding range (La  
252 Sorte et al. 2015). Currently, areas managed for conservation (GAP status 1 and 2) represent  
253 3.23% of the breeding range. Lands with more intermediate mandates (GAP 3) provide a higher  
254 degree of flexibility for the implementation of management recommendations more closely  
255 aligned with maintaining biodiversity. However, these lands are also limited in the state of Texas  
256 (1.71%). Expansion of protections to key habitats would require that resources be spent in  
257 agency land acquisition or in private lands conservation.

258 Our findings demonstrate a need for strengthening current conservation measures and expanding  
259 upon protections for GCWA habitat to ensure greater breeding success and, ultimately, species  
260 recovery. Newer proposals to protect at least 30% of U.S. lands and waters by 2030 to address  
261 the biodiversity and climate crises may provide additional opportunities for land designations  
262 and conservation efforts for imperiled species like GCWA (Exec Order No 14008 2021, CA  
263 Exec Order N-82-20 2020). While a majority of GCWA habitat conservation dollars have been  
264 spent conserving GCWA breeding habitat on the outskirts of the cities of Austin and San  
265 Antonio, our findings support previous work demonstrating higher rates of habitat conversion  
266 near metropolitan areas (Duarte et al. 2013). Given the scarcity of public lands, the distribution

267 of intact forest habitat, and the relatively high amount of habitat loss and degradation occurring  
268 in and around metropolitan areas, future GCWA habitat conservation efforts should be more  
269 focused on supporting current protected areas and expanding protections to quality habitats in the  
270 Balcones Canyonlands and Fort Hood areas and regions west of San Antonio and Fort Worth.  
271 Additionally, projected species distribution models reflecting climate change impacts on tree  
272 species indicate that the Texas Hill Country will continue to be a stronghold for Ashe-juniper  
273 (with potential for population stabilization and maybe even increase/spread to the northeast;  
274 McKenney et al. 2007). This suggests that efforts to conserve or restore quality GCWA habitat  
275 will have long-term benefits.

276 We recognize the limitations of the analysis which equate all available mixed or evergreen  
277 forests within the breeding range, and not strictly those with Ashe-juniper components, as  
278 potentially suitable habitat for GCWA nesting. This is mainly due to current publicly available  
279 data sources and lack of LiDAR or other advanced geospatial datasets that would clarify spectral  
280 or structural differences in forest composition. Regardless, overall classification accuracies of the  
281 habitat loss dataset followed methods that average a mean absolute error of less than 3%  
282 (Kennedy et al. 2018). Additionally, datasets used for assessing habitat quality, though they  
283 represent the most current version available, are already out of date. Collectively, this indicates  
284 that our estimates for available habitat may be more liberal than in actuality. In the context of  
285 federal species listing and review, landscape change analyses, habitat identification and  
286 classification, and the characterization of trends over time must be considered. The metrics used  
287 in this study are meant to facilitate such consideration: they can be applied to multiple scales and  
288 interpreted by non-GIS audiences, helping diverse stakeholder groups to engage in the  
289 conservation decision making process. While current limitations in data, technology, and metrics

290 may influence interpretation of landscapes, the intent is for future research to continue to  
291 improve upon this methodology and on our understanding of the changing habitat.

292 Human landscape modification is likely to continue in the Texas Hill Country, but conservation  
293 and land management actions can be taken to minimize further habitat loss and degradation in  
294 GCWA breeding range. This information will assist researchers and managers in prioritizing  
295 range-wide breeding habitat conservation efforts and highlights the significant role land  
296 management for conservation biodiversity plays on the landscape. There remains a need to grow  
297 the network of protected areas for GCWA restoration. Further, continued regular spatiotemporal  
298 assessments of habitat quantity and quality are necessary to assess changes to species potential  
299 for persistence and extrapolate population viability given these dynamics.

300

### 301 **ACKNOWLEDGEMENTS**

302 Acknowledgements: We thank J Malcom, T Niederman and L O'Donnell for their thoughtful  
303 feedback in reviewing this work. We also thank the organizations that curate these publicly  
304 available datasets and the community scientists that work to collect these data. This research was  
305 conducted on secondary data sources. To our knowledge, no organisms were harmed in the  
306 collection of the datasets used.

## LITERATURE CITED

- Bairlein, F. 2016. Migratory birds under threat. *Science* 354:547-548.
- Colón, M.R., M.R. Hutchinson, A.M. Long, G. Voelker, and M.L. Morrison. 2019. Postbreeding Habitat Use by Golden-Cheeked Warblers (*Setophaga chrysoparia*). *Western North American Naturalist* 79:337-346.
- Diamond, D.D. [online]. 2007. Range-wide modeling of Golden-cheeked warbler habitat. [https://tpwd.texas.gov/business/grants/wildlife/section-6/docs/birds/e72\\_final\\_report.pdf](https://tpwd.texas.gov/business/grants/wildlife/section-6/docs/birds/e72_final_report.pdf) (2 February 2021).
- Diamond, D.D., G.A. Rowell, and D.P. Keddy-Hector. 1995. Conservation of Ashe Juniper (*Juniperus ashei* Buchholz) woodland of the central Texas hill country. *Natural Areas Journal* 15: 189-202.
- Duarte, A., J.L.R. Jensen, J.S. Hatfield, and F.W. Weckerly. 2013. Spatiotemporal variation in range-wide golden-cheeked warbler breeding habitat. *Ecosphere* 4:152.
- Eichenwald, A.J., M.J. Evans, and J.W. Malcom. 2020. US imperiled species are most vulnerable to habitat loss on private lands. *Frontiers in Ecology and the Environment* 18: 439-446.
- Esri Inc. (2020). ArcGIS Pro (Version 2.3). Esri Inc. <https://www.esri.com/en-us/arcgis/products/arcgis-pro/overview>.
- Groce, J.E., H.A. Mathewson, M.L. Morrison, and N. Wilkins [online]. 2010. Scientific evaluation for the 5-Year status review of the golden-cheeked warbler. <https://nri.tamu.edu/publications/research-reports/2010/scientific-evaluation-for-the-5-year-status-review-of-the-golden-cheeked-warbler/> (2 February 2021).



Hanski I. 2011. Habitat loss, the Dynamics of Biodiversity, and a Perspective on Conservation.

AMBIO 40:248-255.

Heger N., and T. Hayes. 2013. Change in Golden-cheeked Warbler habitat through time.

Golden-cheeked Warbler Symposium, Austin, TX.

Jackson M.V., L.R. Carrasco, C.Y. Choi, J. Li, Z. Ma, D.S. Melville, T. Mu, H.B. Peng, B.K.

Woodworth, Z. Yang, L. Zhang, and R.A. Fuller. 2019. Multiple habitat use by declining migratory birds necessitates joined-up conservation. *Ecology and Evolution* 9: 2505-2515.

Jette L.A., T.J. Hayden, J.D. Cornelius [online]. 1998. Demographics of the golden-cheeked warbler (*Dendroica Chrysoparia*) on Fort Hood, Texas. Construction Engineering Research

Laboratory, US Army Engineer Research and Development Center, Champaign, Illinois.

Technical Report 98/52. <https://apps.dtic.mil/sti/citations/ADA342389> (2 February 2021).

Kennedy R.E., Z. Yang, N. Gorelick, J. Braaten, L. Cavalcante, W.B. Cohen, and S. Healy.

2018. Implementation of the LandTrendr Algorithm on Google Earth Engine. *Remote Sensing* 10: 691.

La Sorte, F.A., D. Fink, P.J. Blancher, A.D. Rodewald, V. Ruiz-Gutierrez, K.V. Rosenberg,

W.M. Hochachka, P.H. Verburg, and S. Kelling. 2017. Global change and the distributional dynamics of migratory bird populations wintering in Central America. *Global Change Biology* 23:5284-5296.

La Sorte, F.A., D. Fink, W.M. Hochachka, J.L. Aycrigg, K.V. Rosenberg, A.D. Rodewald, N.E.

Bruns, A. Farnsworth, B.L. Sullivan, C. Wood, and S. Kelling. 2015. Documenting stewardship responsibilities across the annual cycle for birds on U.S. public lands. *Ecological Applications* 25: 39-51.

Leu, M., A.M. Haines, C.E. Check, D.M. Costante, J.C. Evans, M.A. Hollingsworth, I.T.

Ritrovato, A.M. Rydberg, A.M. Sandercock, K.L. Thomas, and T.C. Treacle. 2019. Temporal analysis of threats causing species endangerment in the United States. *Conservation Science and Practice* 1: e78.

Lindsay, D.L., K.R. Barr, R.F. Lance, S.A. Tweddale, T.J. Hayden, and P.L. Leberg. 2008.

Habitat fragmentation and genetic diversity of an endangered, migratory songbird, the golden-cheeked warbler (*Dendroica chrysoparia*). *Molecular Ecology* 17: 2122-2133.

Long, A.M., J.C. Newnam, M.R. Colon, K.N. Smith-Hicks, and M.L. Morrison. 2016.

Characteristics of Vegetation Used by Golden-Cheeked Warblers in Central Texas. *Southeastern Naturalist* 15:153-161.

Loomis Austin [online]. 2008. Mapping potential golden-cheeked warbler breeding habitat using remotely sensed forest canopy cover data. Report LAI Project No. 051001. Austin, TX:

Loomis Austin.

[http://hayscountyhcp.com/docs/AppA\\_Mapping\\_Potential\\_GCW\\_Habitat\\_\(20080812\).pdf](http://hayscountyhcp.com/docs/AppA_Mapping_Potential_GCW_Habitat_(20080812).pdf) (2 February 2021).

Magness, D.R., R.N. Wilkins, and S. J Hejl. 2006. Quantitative relationships among golden-

cheeked warbler occurrence and landscape size, composition, and structure. *Wildlife Society Bulletin* 34:473-479.

Martin, T.E and J.J. Roper. 1988. Nest predation and nest-site selection of a western population of the hermit thrush. *The Condor* 90: 51-57.

- McGowan, C. P., N. Allan, J. Servoss, S. Hedwall, and B. Woldridge. 2017. Incorporating population viability models into species status assessment and listing decisions under the U.S. Endangered Species Act. *Global Ecology and Conservation* 12: 119-130.
- McKenney, D.W., J.H. Pedlar, K. Lawrence, K. Campbell, and M.F. Hutchinson. 2007. Potential impacts of climate change on the distribution of North American trees. *BioScience* 57: 939-948.
- Morrison, M.L., R.N. Wilkins, B.A. Collier, J.E. Groce, H.A. Mathewson, T.M. McFarland, A.G. Snelgrove, R.T. Snelgrove, and K.L. Skow [online]. 2010. Golden-cheeked Warbler population distribution and abundance. Texas A&M Institute of Renewable Natural Resources, College Station, Texas, USA. <https://nri.tamu.edu/publications/research-reports/2010/golden-cheeked-warbler-population-distribution-and-abundance/> (2 February 2021).
- Pulich, W.M. 1976. The Golden cheeked Warbler, A Bioecological Study. 172 pp. Texas Parks & Wildlife Department, Austin, Texas.
- Reidy, J.L., M.M. Stake, and F.R. Thompson. 2008. Golden-cheeked warbler nest mortality and predators in urban and rural landscapes. *The Condor* 110: 458-466.
- Reidy, J.L., F.R. Thompson III, L. O'Donnell. 2017. Density and Nest Survival of Golden-Cheeked Warblers: Spatial Scale Matters. *The Journal of Wildlife Management* 81: 678-689.
- Reidy, J.L., F.R. Thompson III, G.M. Connette, and L. O'Donnell. 2018. Demographic rates of Golden-cheeked Warblers in an urbanizing woodland preserve. *The Condor* 120: 249-264.

Robbins, C.S., J.R. Sauer, R.S. Greenberg, and S. Droege. 1989. Population declines in North American birds that migrate to the neotropics. *Proceedings of the National Academy of Science* 86:7658-7662.

Dreiss, L.M., and J.W. Malcom [online]. 2021. Identifying key federal, state, and private lands strategies for achieving 30x30 in the US. <https://doi.org/10.1101/2021.03.26.437234>

Shaw, D.M. and S.F. Atkinson. 1990. An Introduction to the Use of Geographic Information Systems for Ornithological Research. *The Condor* 92:564–570.

Sohl, T.L., R. Ryan, M. Bouchard, K. Sayler, J. Dornbierer, S. Wika, R. Quenzer, and A. Friesz. 2018. Modeled historical land use and land cover for the conterminous United States: 1938-1992: U.S. Geological Survey data release.

Taylor C.M. and B.J.M. Stutchbury. 2015. Effects of breeding versus winter habitat loss and fragmentation on the population dynamics of a migratory songbird. *Ecological Applications* 26:424-437.

Texas Demographic Center [online]. 2019. Texas population projections 2010-2050: [https://demographics.texas.gov/Resources/publications/2019/20190128\\_PopProjectionsBrief.pdf](https://demographics.texas.gov/Resources/publications/2019/20190128_PopProjectionsBrief.pdf) > (2 February 2021).

Thompson, P.L.B. Rayfield, and A. Gonzalez. 2016. Loss of habitat and connectivity erodes species diversity, ecosystem functioning, and stability in metacommunity networks. *Ecogeography* 40:98-108.

Trzcinski, M.K., L. Fahrig, and G. Merriam. 1999. Independent effects of forest cover and fragmentation on the distribution of forest breeding birds. *Ecological Applications* 9: 586-593.

Twedt, D.J. and J. Henne-Kerr. 2001. Artificial cavities enhance breeding bird densities in managed forests. *Wildlife Society Bulletin* 29: 680-687.

U.S. Census Bureau [online]. 2020. National Demographic Analysis:

<https://www.census.gov/programs-surveys/decennial-census/about/coverage-measurement/da.html> (2 February 2021).

U.S. Fish and Wildlife Service [online]. 1992. Golden-Cheeked Warbler (*Dendroica Chrysoparia*) Recovery Plan. Albuquerque, New Mexico.

[https://www.edwardsaquifer.org/wp-content/uploads/2019/02/1991\\_FWS\\_Golden-CheekedWarblerRecoveryPlan.pdf](https://www.edwardsaquifer.org/wp-content/uploads/2019/02/1991_FWS_Golden-CheekedWarblerRecoveryPlan.pdf) (2 February 2021).

U.S. Geological Survey (USGS) Gap Analysis Project (GAP), 2020, Protected Areas Database of the United States (PAD-US) 2.1: U.S. Geological Survey data release, <https://doi.org/10.5066/P92QM3NT>.

Wahl, R., D.D. Diamond, and D. Shaw [online]. 1990. The golden-cheeked warbler: a status review. Final report, submitted to the Office of Endangered Species, U. S. Fish and Wildlife Service, Albuquerque, New Mexico.

Young, A.C., and G.M. Clarke. 2000. Genetics, demography and the viability of fragmented populations. Cambridge University Press, Cambridge.

Zitske, B.P., M.G. Betts, A.W. Diamond. 2011. Negative Effects of Habitat Loss on Survival of Migrant Warblers in a Forest Mosaic. *Conservation Biology* 25:993-1001.

## TABLES

Table 1. Data acquired for spatiotemporal analyses on habitat disturbance, quality, and sightings.

| Data                         | Source                               | Temporal   | Spatial    | Analysis            |
|------------------------------|--------------------------------------|------------|------------|---------------------|
|                              |                                      | Resolution | Resolution |                     |
| Landscape change             | Eichenwald et al. 2020               | 1985-2018  | 30m        | Habitat disturbance |
| Forest Change                | MRLC National Land<br>Cover Database | 1985-2016  | 30m        | Habitat disturbance |
| Modeled historic<br>land use | Sohl et al. 2018                     | 1985       | 250m       | Habitat quality     |
| NLCD                         | MRLC National Land<br>Cover Database | 2016       | 30m        | Habitat quality     |
| Warbler sightings            | iNaturalist & eBird                  | 1934-2020  | point      | Sighting Hotspots   |
| Protected Areas              | U.S. Geological Survey               | 2019       | vector     | All                 |
| Urban areas                  | U.S. Census                          | 2019       | vector     | Habitat disturbance |
| Breeding range               | U.S. Geological Survey<br>GAP        | 2001       | vector     | Study area          |

## FIGURE LEGENDS

Figure 1. Annual declines in forested land cover relative to a 1985 baseline for portions of the Golden-cheeked Warbler breeding range that fall outside of urban boundaries and portions that fall within the urban boundaries of San Antonio and Austin, respectively.

Figure 2. A map of overall change in Golden-cheeked Warbler breeding habitat quality between 1985 and 2016. Blues indicate areas of lower-quality habitat in 1985, white indicates high-quality habitat in 1985, and red indicates high-quality habitat areas that experienced a decline in habitat quality between 1985 and 2016.

Figure 3. Percent of the Golden-cheeked Warbler breeding range by habitat quality value (0 = low quality, 4 = high quality) for habitats throughout the entire range and for habitats that fall inside protected areas managed for biodiversity conservation (U.S. Geological Survey's Protected Areas Database of the U.S., GAP codes 1 and 2) for 1985 and 2016, respectively.

Figure 4. Histograms showing frequency of patch size for high quality habitat areas in 1985 (gray) and 2016 (black hatching) indicate habitat fragmentation over the time period. Means of the two groups were significantly different at  $\alpha = 0.05$  (p value <0.001).

Figure 5. A map comparing locations of high-quality habitat in 2016, protected areas managed for biodiversity conservation (U.S. Geological Survey's Protected Areas Database of the U.S.,



GAP codes 1 and 2), and hotspots for Golden-cheeked Warbler sightings between 1980 – 2000 (in blue) and 2010 – 2020 (in red).

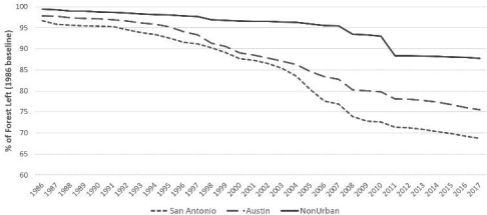

## Habitat Quality

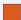

Degraded (1985 – 2016)

High (1985)

Low

Acuña

San Angelo

Abilene

TEXAS

San Antonio

Austin

Killeen

Waco

Fort Worth Dallas

Plano

Denton

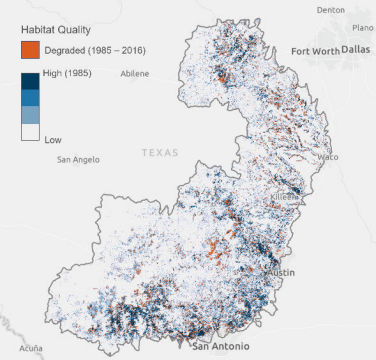

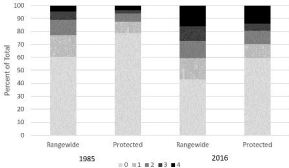

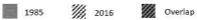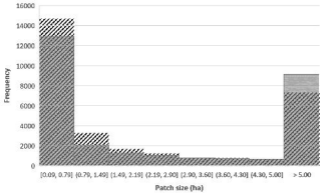

- 2010 – 2020 Hotspot
- 1980 – 2000 Hotspot
- High-quality habitat
- Protected areas
- Breeding range

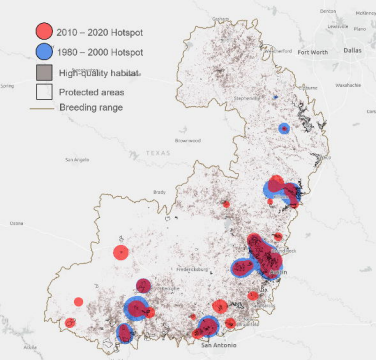

Source: https://www.biorxiv.org/content/10.1101/2021.03.25.436967v4.full.pdf
